# Supplementary material for: Whole-genome sequencing of 1,171 elderly admixed individuals from Brazil
Source: PubMed Central journal article supplement (PMC8897431; doi:10.1038/s41467-022-28648-3), 2022-03-04
Supplement: 41467_2022_28648_MOESM3_ESM.pdf [file 41467_2022_28648_MOESM3_ESM.pdf]

## **Description of Additional Supplementary Files**

File Name: Supplementary Data 1

Description: List of tools and versions applied in the bioinformatics pipeline.

File Name: Supplementary Data 2

Description: List of 4,250 OMIM disease genes used in clinical analyses section containing Approved\_Symbol, Gene\_Name, MIM\_number and Phenotypes.

File Name: Supplementary Data 3

Description: Pathogenic variants in OMIM Disease genes with frequencies above 10% in SABE dataset.

File Name: Supplementary Data 4

Description: Reclassified variants after manual curation in genes with dominant mode of inheritance.

File Name: Supplementary Data 5

Description: Pathogenic variants and categories after manual curation in genes with dominant mode of inheritance.

File Name: Supplementary Data 6

Description: Pathogenic findings on ACMG-59 genes.

File Name: Supplementary Data 7

Description: Variant-based incidence of selected genes associated with recessively inherited disorders.

File Name: Supplementary Data 8

Description: OMIM genes with mobile element insertion events in exonic regions.
